# Supplementary material for: Dynamin-2 Regulates Fusion Pore Expansion and Quantal Release through a Mechanism that Involves Actin Dynamics in Neuroendocrine Chromaffin Cells
Source: PubMed Central journal article supplement (PMC3734226; doi:10.1371/journal.pone.0070638), 2013-08-05
Supplement: pone.0070638.s001.pdf [file pone.0070638.s001.pdf]

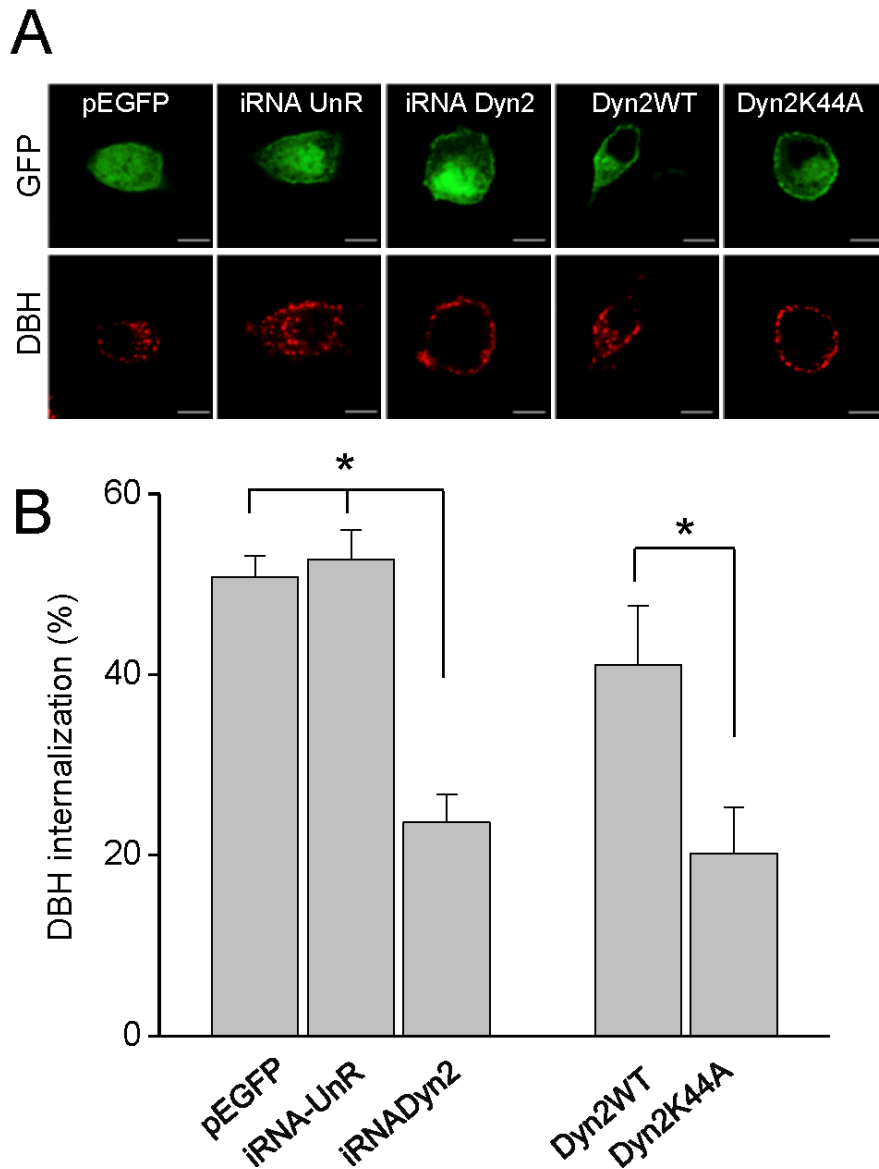

**Figure S1: Expression of iRNADyn-2 and Dyn2K44A efficiently inhibit compensatory endocytosis of chromaffin granules.** Chromaffin cells transfected with pEGFP, iRNA-UnR, Dyn2WT, Dyn2K44A or iRNADyn2 were stimulated with high potassium, incubated with an anti-DBH antibody and then fixed. Anti-DBH antibodies internalization was assessed. **A:** Confocal imaging showing anti-DBH internalization and GFP labeling in cells expressing the different constructs. Scale bar= 5  $\mu$ m. **B:** Analysis of the internalization of DBH positive vesicles by Euclidean distance map. Data are the mean values  $\pm$  SEM (n = at least 25 cells per condition). \*p<0.05.
