# Supplementary material for: Dynamin-2 Regulates Fusion Pore Expansion and Quantal Release through a Mechanism that Involves Actin Dynamics in Neuroendocrine Chromaffin Cells
Source: PubMed Central journal article supplement (PMC3734226; doi:10.1371/journal.pone.0070638), 2013-08-05
Supplement: pone.0070638.s002.pdf [file pone.0070638.s002.pdf]

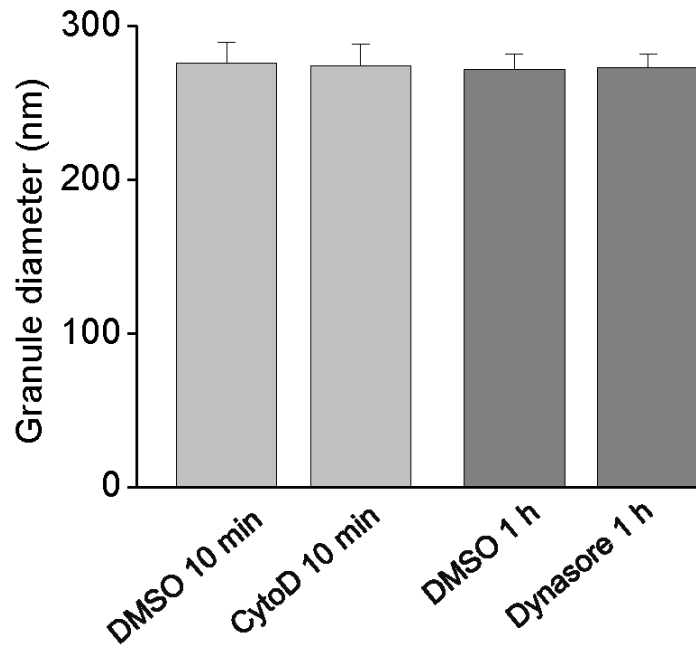

**Figure S2: The acute inhibition of dynamin's GTP-ase activity or the disruption of actin dynamics does not change the size of chromaffin granules in resting cells.**

Mean values for chromaffin granule diameters from bovine chromaffin cells at rest condition treated with 4  $\mu$ M CytoD, 100  $\mu$ M dynasore or the vehicle DMSO. At least 15 vesicles per cell and 5 cells per each condition were measured.
