# Supplementary material for: Dynamin-2 Regulates Fusion Pore Expansion and Quantal Release through a Mechanism that Involves Actin Dynamics in Neuroendocrine Chromaffin Cells
Source: PubMed Central journal article supplement (PMC3734226; doi:10.1371/journal.pone.0070638), 2013-08-05
Supplement: pone.0070638.s003.pdf [file pone.0070638.s003.pdf]

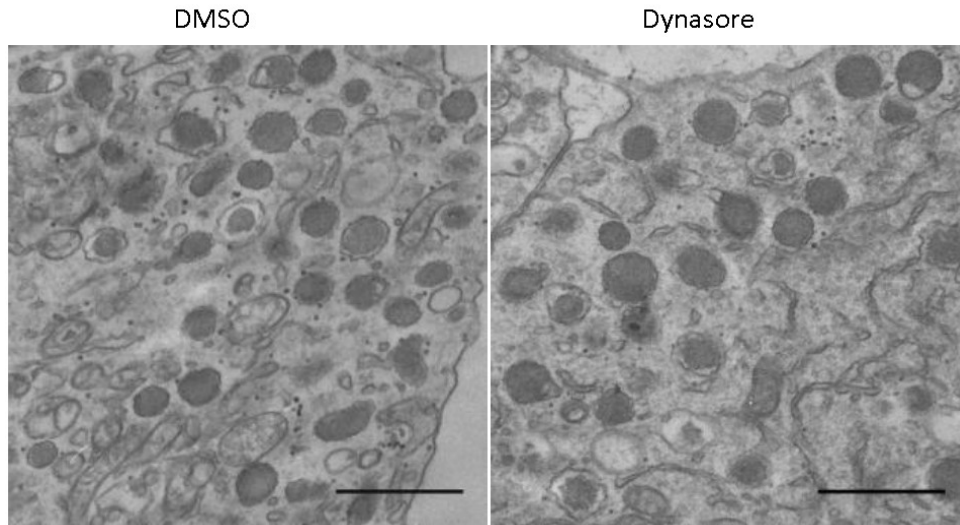

**Figure S3: Inhibition of dynamin GTP-ase activity does not induces fusion between chromaffin granules in stimulated cells.** No evidence of fusion between granules or compound exocytosis was observed under electron microscopy in cells stimulated with 10  $\mu$ M DMPP and treated with 100  $\mu$ M dynasore or the vehicle DMSO. Scale bar = 1  $\mu$ m. Note that no differences in granule diameter were found between dynasore and DMSO treated cells under stimulation. At least 25 vesicles per cell and 5 cells per each condition were measured.
