# Supplementary material for: Dynamin-2 Regulates Fusion Pore Expansion and Quantal Release through a Mechanism that Involves Actin Dynamics in Neuroendocrine Chromaffin Cells
Source: PubMed Central journal article supplement (PMC3734226; doi:10.1371/journal.pone.0070638), 2013-08-05
Supplement: pone.0070638.s004.pdf [file pone.0070638.s004.pdf]

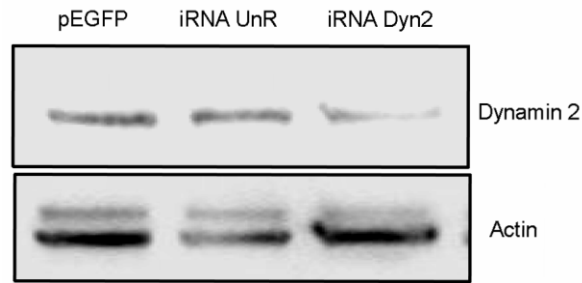

**Figure S4: iRNA-Dyn2 decreases the expression of dynamin-2.** As the efficiency of transfection with chromaffin cells is relatively low (less than 10%) and the siRNA sequence directed against bovine dynamin-2 has 100% similarity with human dynamin-2, we checked the efficiency of iRNADyn2 by western blot on human HeLa cells. 48 h after transfection HeLa cells were lysed and protein extract (100 $\mu$ g) were used for electrophoresis and western blot analysis using antibodies against Dynamin 2 and Actin. In this condition, dynamin-2 expression decreased by 71% as compared with the UnR-siRNA.
